# Supplementary material for: Different Resistance to DON versus HT2 + T2 Producers in Nordic Oat Varieties
Source: MDPI journal article supplement (doi:10.3390/toxins14050313), 2022-04-28
Supplement: s1 [file s1]

# Supplementary info

**Table S1: Overview of the different field trials in which mycotoxin and/or Fungal DNA content were quantified and included in the statistical analysis.**

| Field<br>(Year<br>and site<br>number) | DON <sup>1</sup> | HT2+T2 <sup>2</sup> | Fungal<br>DNA <sup>3</sup> | FA <sup>3</sup> | FG <sup>3</sup> | FCFG <sup>3</sup> | FL <sup>3</sup> | FP <sup>3</sup> | MM <sup>3</sup> | MN <sup>3</sup> |
|---------------------------------------|------------------|---------------------|----------------------------|-----------------|-----------------|-------------------|-----------------|-----------------|-----------------|-----------------|
| 2011-1                                | x                | NA                  |                            |                 |                 |                   |                 |                 |                 |                 |
| 2011-2                                | x                | NA                  |                            |                 |                 |                   |                 |                 |                 |                 |
| 2011-3                                | x                | NA                  |                            |                 |                 |                   |                 |                 |                 |                 |
| 2011-4                                | x                | NA                  |                            |                 |                 |                   |                 |                 |                 |                 |
| 2011-6                                | x                | NA                  |                            |                 |                 |                   |                 |                 |                 |                 |
| 2011-7                                | x                | NA                  |                            |                 |                 |                   |                 |                 |                 |                 |
| 2011-8                                | x                | NA                  |                            |                 |                 |                   |                 |                 |                 |                 |
| 2012-1                                | x                | NA                  |                            |                 |                 |                   |                 |                 |                 |                 |
| 2012-4                                | x                | NA                  |                            |                 |                 |                   |                 |                 |                 |                 |
| 2012-5                                | x                | x                   |                            |                 |                 |                   |                 |                 |                 |                 |
| 2012-7                                | x                | x                   |                            |                 |                 |                   |                 |                 |                 |                 |
| 2012-8                                | x                | NA                  |                            |                 |                 |                   |                 |                 |                 |                 |
| 2013-4                                | NA               | x                   | x                          | x               |                 |                   | x               |                 |                 |                 |
| 2013-7                                | NA               | (x)                 | x                          | x               | x               | x                 | x               |                 |                 |                 |
| 2013-8                                | NA               | (x)                 | x                          |                 |                 |                   | x               | x               |                 |                 |
| 2014-3                                | NA               | x                   | x                          | x               |                 |                   | x               | x               |                 |                 |
| 2014-4                                | NA               | x                   | x                          | x               |                 |                   | x               | x               |                 | x               |
| 2014-5                                | NA               | x                   | x                          | x               | x               | x                 | x               | x               |                 | x               |
| 2015-4                                | x                | NA                  | x                          | x               | x               | x                 | x               | x               | x               | x               |
| 2015-5                                | NA               | x                   | x                          | x               |                 |                   | x               | x               | x               | x               |
| 2015-6                                | NA               | x                   | x                          | x               |                 |                   | x               | x               |                 |                 |
| 2015-7                                | x                | NA                  | x                          |                 |                 |                   | x               | x               |                 |                 |
| 2015-9                                | x                | NA                  | x                          | x               | x               | x                 | x               | x               | x               | x               |
| 2016-3                                | x                | NA                  | x                          | x               | x               | x                 | x               | x               | x               | x               |
| 2016-7                                | x                | NA                  | x                          | x               | x               | x                 | x               | x               | x               |                 |
| 2017-10                               | x                | NA                  | x                          | x               | x               | x                 |                 |                 | x               | x               |
| 2018-3                                | (x)              | x                   | x                          | x               | x               | x                 | x               | x               |                 |                 |
| 2019-2                                | x                | x                   | x                          | x               | x               | x                 | x               | x               | x               |                 |
| 2019-5                                | (x)              | x                   | x                          | x               |                 |                   | x               | x               |                 |                 |
| 2019-6                                | x                | (x)                 | x                          | x               | x               | x                 | x               | x               |                 |                 |
| 2019-9                                | NA               | x                   | x                          | x               |                 |                   | x               | x               |                 |                 |
| 2019-10                               | (x)              | x                   | x                          | x               |                 |                   | x               |                 | x               |                 |
| 2020-2                                | (x)              | x                   |                            |                 |                 |                   |                 |                 |                 |                 |
| Total<br>number<br>of fields          | 24               | 17                  | 20                         | 18              | 10              | 10                | 19              | 16              | 8               | 7               |

1: X=The content of DON was above 100 µg/kg in grains harvested from variety Belinda. (X) = DON below 100 µg/kg in Belinda. NA=not analysed

2: X= The content of HT2+T2 was above 25 µg/kg in grains harvested from variety Belinda. (X) = HT2+T2 below 25 µg/kg in Belinda. NA=not analysed

3: The DNA content of *Fusarium avenaceum* (FA), *Fusarium culmorum* (FC), *Fusarium graminearum* (FG), *Fusarium langsethiae* (FL), *Fusarium poae* (FP), *Microdochium majus* (MM), and *Microdochium nivale* (MN) in grains from all the fields harvested in years 2013-2019 was analysed by qPCR. Only data from fields in which Belinda had a DNA content of more than 20 pg/µg of the specific fungal species were included in the statistical analysis of possible significant differences in fungal DNA content between varieties (indicated by a separate column for each fungal species).

**Table S2: Estimated average levels of mycotoxins (ug/kg) and fungal DNA (pg fungal DNA per µg plant DNA) in oat varieties and breeding lines**

| Variety or<br>breeding line | DON <sup>1,5</sup> | Group <sup>2</sup> | N <sup>3</sup> | HT2+<br>T2 <sup>1,5</sup> | Group <sup>2</sup> | N <sup>3</sup> | Mycotox<br>years | FA <sup>4</sup> | Group | N  | FCFG <sup>4</sup> | Group | N  | FG <sup>4</sup> | Group | N  | FL <sup>4</sup> | Group | N  | FP <sup>4</sup> | Group | N  | MM <sup>4</sup> | Group | N | MN <sup>4</sup> | Group | N  |
|-----------------------------|--------------------|--------------------|----------------|---------------------------|--------------------|----------------|------------------|-----------------|-------|----|-------------------|-------|----|-----------------|-------|----|-----------------|-------|----|-----------------|-------|----|-----------------|-------|---|-----------------|-------|----|
| Akseli                      | 297                | DE                 | 12             | 148                       | ABCDE              | 6              | 2011-14          | 197             | AB    | 5  |                   |       |    |                 |       |    | 645             | ABCD  | 6  | 134             | AB    | 4  |                 |       |   |                 |       |    |
| Avanti                      | 968                | AB                 | 12             | 230                       | ABCDE              | 3              | 2011-13          |                 |       | <3 |                   |       |    |                 |       |    | 449             | ABCD  | 3  |                 |       |    |                 |       |   |                 |       |    |
| Avetron                     | 176                | E                  | 8              | 126                       | BCDE               | 12             | 2013-20          | 84              | AB    | 18 | 34                | A     | 10 | 33              | A     | 10 | 419             | BCD   | 19 | 51              | AB    | 16 | 118             | A     | 8 | 6               | C     | 13 |
| Belinda                     | 777                | ABC                | 20             | 287                       | AB                 | 14             | 2011-20          | 194             | AB    | 18 | 151               | A     | 10 | 123             | A     | 10 | 586             | AB    | 19 | 76              | AB    | 16 | 240             | A     | 8 | 39              | A     | 13 |
| Caddy                       |                    |                    | <3             | 220                       | ABCDE              | 4              | 2018-19          | 154             | AB    | 5  |                   |       |    |                 |       |    | 620             | ABCD  | 5  | 48              | AB    | 4  |                 |       |   | 11              | ABC   | 3  |
| Canary                      |                    |                    | <3             | 99                        | BCDE               | 4              | 2019             | 230             | AB    | 5  |                   |       |    |                 |       |    | 477             | ABCD  | 5  | 77              | AB    | 4  |                 |       |   | 11              | ABC   | 3  |
| Delfin                      | 419                | ABCDE              | 6              |                           |                    | <3             | 2015-17          | 245             | AB    | 6  | 90                | A     | 4  | 89              | A     | 4  | 456             | ABCD  | 6  | 86              | AB    | 6  | 220             | A     | 4 | 42              | AB    | 6  |
| Dovre                       | 255                | BCDE               | 5              | 176                       | ABCDE              | 6              | 2012-14          | 104             | AB    | 5  |                   |       |    |                 |       |    | 373             | ABCD  | 6  | 35              | AB    | 4  |                 |       |   |                 |       |    |
| Eidskog                     |                    |                    | <3             | 130                       | BCDE               | 6              | 2018-20          | 147             | AB    | 6  | 61                | A     | 3  | 18              | A     | 3  | 462             | ABCD  | 6  | 74              | AB    | 5  |                 |       |   | 12              | ABC   | 4  |
| Gimse                       | 434                | BCDE               | 12             | 187                       | ABCDE              | 6              | 2011-14          | 104             | AB    | 5  |                   |       |    |                 |       |    | 467             | ABCD  | 6  | 105             | AB    | 4  |                 |       |   |                 |       |    |
| GN 07133                    | 1511               | A                  | 7              |                           |                    | <3             | 2011             |                 |       | <3 |                   |       |    |                 |       |    |                 |       |    |                 |       |    |                 |       |   |                 |       |    |
| GN 07134                    | 759                | ABCD               | 7              |                           |                    | <3             | 2011             |                 |       | <3 |                   |       |    |                 |       |    |                 |       |    |                 |       |    |                 |       |   |                 |       |    |
| GN 08009                    | 600                | ABCDE              | 12             | 104                       | ABCDE              | 3              | 2011-13          |                 |       | <3 |                   |       |    |                 |       |    | 490             | ABCD  | 3  |                 |       |    |                 |       |   |                 |       |    |
| GN 09078                    | 1134               | ABCD               | 5              | 432                       | ABC                | 3              | 2012-13          |                 |       | <3 |                   |       |    |                 |       |    | 750             | ABCD  | 3  |                 |       |    |                 |       |   |                 |       |    |
| GN 09111                    |                    |                    | <3             | 121                       | ABCDE              | 4              | 2013-14          | 159             | AB    | 5  |                   |       |    |                 |       |    | 278             | BCD   | 6  | 70              | AB    | 4  |                 |       |   |                 |       |    |
| GN 11135                    |                    |                    | <3             | 157                       | ABCDE              | 3              | 2014             | 236             | AB    | 3  |                   |       |    |                 |       |    | 437             | ABCD  | 3  | 102             | AB    | 3  |                 |       |   |                 |       |    |
| GN 12230                    | 852                | ABCD               | 6              |                           |                    | <3             | 2015-17          | 105             | AB    | 7  | 91                | A     | 5  | 90              | A     | 5  | 531             | ABCD  | 7  | 69              | AB    | 7  | 237             | A     | 6 | 13              | ABC   | 7  |
| GN 14070                    |                    |                    | <3             | 132                       | ABCDE              | 5              | 2019-20          | 109             | AB    | 6  |                   |       |    |                 |       |    | 408             | ABCD  | 6  | 93              | AB    | 5  |                 |       |   | 14              | ABC   | 4  |
| GN 14182                    |                    |                    | <3             | 145                       | ABCDE              | 6              | 2019-20          | 111             | AB    | 6  | 97                | A     | 3  | 106             | A     | 3  | 316             | BCD   | 6  | 29              | AB    | 5  |                 |       |   | 14              | ABC   | 4  |
| GN 14189                    |                    |                    | <3             | 157                       | ABCDE              | 6              | 2019-20          | 141             | AB    | 6  |                   |       |    |                 |       |    | 452             | ABCD  | 6  | 73              | AB    | 5  |                 |       |   | 15              | ABC   | 4  |
| GN 14209                    |                    |                    | <3             | 180                       | ABCDE              | 6              | 2019-20          | 261             | AB    | 6  | 42                | A     | 3  | 45              | A     | 3  | 733             | ABCD  | 6  | 89              | AB    | 5  |                 |       |   | 14              | ABC   | 4  |
| GN 15154                    |                    |                    | <3             | 205                       | ABCDE              | 5              | 2019-20          | 101             | AB    | 6  | 44                | A     | 3  | 48              | A     | 3  | 539             | ABCD  | 6  | 58              | AB    | 5  |                 |       |   | 15              | ABC   | 4  |
| GN 16061                    |                    |                    | <3             | 165                       | ABCDE              | 5              | 2019-20          | 158             | AB    | 5  |                   |       |    |                 |       |    | 609             | ABCD  | 5  | 128             | AB    | 4  |                 |       |   | 11              | ABC   | 3  |
| GN16165                     |                    |                    | <3             | 278                       | ABCDE              | 5              | 2019-20          | 195             | AB    | 5  |                   |       |    |                 |       |    | 673             | ABCD  | 5  | 67              | AB    | 4  |                 |       |   | 11              | ABC   | 3  |
| GN 16174                    |                    |                    | <3             | 112                       | BCDE               | 5              | 2019-20          | 114             | AB    | 5  |                   |       |    |                 |       |    | 297             | BCD   | 5  | 48              | AB    | 4  |                 |       |   | 34              | ABC   | 3  |
| Gunhild                     |                    |                    | <3             | 276                       | ABCD               | 6              | 2018-20          | 245             | AB    | 6  | 130               | A     | 3  | 57              | A     | 3  | 393             | ABCD  | 6  | 45              | AB    | 5  |                 |       |   | 12              | ABC   | 4  |

|                                                   |          |        |    |        |        |    |         |        |       |    |        |      |    |        |      |    |         |       |    |        |       |    |        |       |   |      |       |    |
|---------------------------------------------------|----------|--------|----|--------|--------|----|---------|--------|-------|----|--------|------|----|--------|------|----|---------|-------|----|--------|-------|----|--------|-------|---|------|-------|----|
| Haga                                              | 437      | BCDE   | 20 | 176    | BCDE   | 14 | 2011-20 | 164    | AB    | 18 | 75     | A    | 10 | 57     | A    | 10 | 464     | ABCD  | 19 | 115    | A     | 16 | 233    | A     | 8 | 13   | ABC   | 13 |
| Hurdal                                            | 297      | DE     | 12 | 128    | BCDE   | 6  | 2011-14 | 68     | AB    | 5  |        |      |    |        |      |    | 517     | ABCD  | 6  | 90     | AB    | 4  |        |       |   |      |       |    |
| Hurum                                             | 364      | CDE    | 18 | 81     | E      | 9  | 2011-18 | 81     | AB    | 13 | 95     | A    | 8  | 89     | A    | 8  | 281     | CD    | 14 | 48     | AB    | 12 | 142    | A     | 6 | 16   | ABC   | 10 |
| Ivory                                             | 963      | AB     | 12 |        |        | <3 | 2011-12 |        |       |    |        |      |    |        |      |    |         |       |    |        |       |    |        |       |   |      |       |    |
| LW 06W146-02                                      |          |        | <3 | 295    | ABCDE  | 3  | 2014    | 123    | AB    | 3  |        |      |    |        |      |    | 546     | ABCD  | 3  | 42     | AB    | 3  |        |       |   |      |       |    |
| Mirella                                           | 772      | ABCD   | 12 | 130    | ABCDE  | 3  | 2011-13 |        |       | <3 |        |      |    |        |      |    | 625     | ABCD  | 3  |        |       |    |        |       |   |      |       |    |
| Moby                                              |          |        | <3 | 322    | ABCD   | 4  | 2013-14 | 388    | A     | 5  |        |      |    |        |      |    | 749     | ABC   | 6  | 72     | AB    | 4  |        |       |   |      |       |    |
| Nike                                              |          |        | <3 | 177    | ABCDE  | 4  | 2013-14 | 128    | AB    | 5  |        |      |    |        |      |    | 336     | ABCD  | 6  | 61     | AB    | 4  |        |       |   |      |       |    |
| Odal                                              | 367      | CDE    | 20 | 419    | A      | 14 | 2011-20 | 123    | AB    | 18 | 31     | A    | 10 | 31     | A    | 10 | 889     | A     | 19 | 78     | AB    | 16 | 186    | A     | 8 | 10   | BC    | 13 |
| Poseidon                                          |          |        | <3 | 219    | ABCDE  | 4  | 2013-14 | 330    | AB    | 5  |        |      |    |        |      |    | 471     | ABCD  | 6  | 55     | AB    | 4  |        |       |   |      |       |    |
| Ridabu                                            |          |        | <3 | 190    | ABCDE  | 6  | 2018-20 | 90     | AB    | 6  | 19     | A    | 3  | 17     | A    | 3  | 548     | ABCD  | 6  | 106    | AB    | 5  |        |       |   | 21   | ABC   | 4  |
| Ringsaker                                         | 422      | BCDE   | 20 | 158    | BCDE   | 14 | 2011-20 | 135    | AB    | 18 | 28     | A    | 10 | 23     | A    | 10 | 453     | BCD   | 19 | 101    | A     | 16 | 108    | A     | 8 | 12   | ABC   | 13 |
| Skarnes                                           | 404      | BCDE   | 12 | 165    | ABCDE  | 6  | 2011-14 | 148    | AB    | 5  |        |      |    |        |      |    | 405     | ABCD  | 6  | 62     | AB    | 4  |        |       |   |      |       |    |
| Staur                                             | 235      | CDE    | 6  | 118    | ABCDE  | 3  | 2015-18 | 146    | AB    | 8  | 73     | A    | 6  | 70     | A    | 6  | 748     | AB    | 8  | 106    | AB    | 8  | 253    | A     | 6 | 16   | ABC   | 8  |
| Symphony                                          | 808      | ABCD   | 12 | 126    | ABCDE  | 3  | 2011-13 |        |       | <3 |        |      |    |        |      |    | 420     | ABCD  | 3  |        |       |    |        |       |   |      |       |    |
| Vinger                                            | 338      | DE     | 20 | 102    | DE     | 14 | 2011-20 | 134    | AB    | 18 | 36     | A    | 10 | 35     | A    | 10 | 332     | BCD   | 19 | 46     | AB    | 16 | 105    | A     | 8 | 12   | ABC   | 13 |
| Våler                                             | 455      | ABCDE  | 13 | 106    | CDE    | 14 | 2012-20 | 135    | AB    | 18 | 36     | A    | 10 | 36     | A    | 10 | 278     | D     | 19 | 42     | AB    | 16 | 203    | A     | 8 | 21   | ABC   | 13 |
| Årnes                                             | 442      | ABCDE  | 6  | 264    | ABCD   | 7  | 2013-18 | 68     | B     | 13 | 46     | A    | 8  | 43     | A    | 8  | 483     | ABCD  | 14 | 26     | B     | 12 | 84     | A     | 6 | 18   | ABC   | 10 |
| Range <sup>6</sup> ,<br>P(variety) <sup>7</sup> : | 176-1511 | <0.001 |    | 81-419 | <0.001 |    |         | 68-388 | 0.001 |    | 19-151 | 0.12 |    | 17-123 | 0.10 |    | 278-889 | 0.001 |    | 26-134 | 0.004 |    | 84-253 | 0.003 |   | 6-42 | 0.002 |    |
| N <sup>8</sup>                                    | 25       |        |    | 39     |        |    |         | 36     |       |    | 18     |      |    | 18     |      |    | 41      |       |    | 36     |       |    | 12     |       |   | 25   |       |    |
|                                                   |          |        |    |        |        |    |         |        |       |    |        |      |    |        |      |    |         |       |    |        |       |    |        |       |   |      |       |    |

1: Estimated average levels of deoxynivalenol (DON) and HT2+T2-toxins (in µg/kg) of a variety, based on Mixed effects model and Tukey analysis in Minitab.

2: Means that do not share a letter are significantly different according to Tukey Method and 95% Confidence.

3: N= number of field sites from which data for a specific variety was included in the analysis.

4: Estimated average levels of fungal DNA (pg fungal DNA per µg plant DNA) in grains harvested from a variety, based on Mixed effects model and Tukey analysis in Minitab.

The DNA content of the following fungal species were analysed by quantitative PCR: *Fusarium avenaceum* (FA), *Fusarium culmorum* (FC), *Fusarium graminearum* (FG), *Fusarium langsethiae* (FL), *Fusarium poae* (FP), *Microdochium nivale* (MN) and *Microdochium majus* (MM).

5: Ln transformed data of mycotoxins or fungal DNA contents were used as input in the statistical analysis (Mixed effects model in Minitab). The values shown in this table are back transformed data of the mean ln output for each variety calculated by Mixed effects model and Tukey pairwise comparison in Minitab.

6: Range min-max value in the dataset

7: P value for variety effects calculated by Mixed effects model in Minitab

8: The number of oat varieties and breeding lines that were included in the statistical analysis

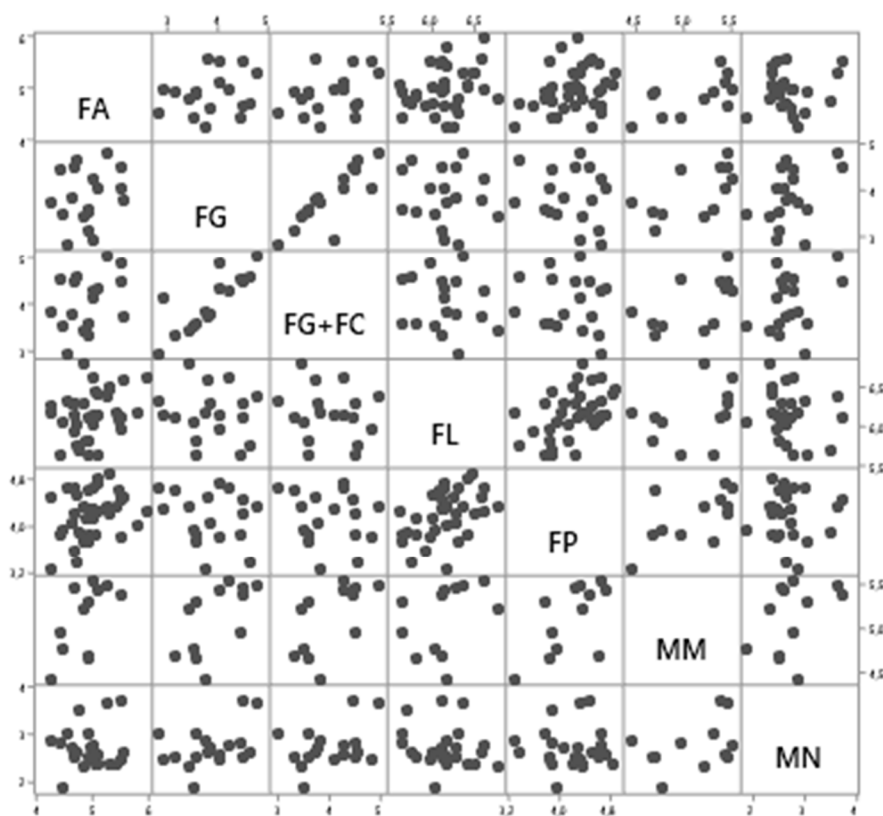

**Figure S1:** Matrix plot showing the ranking of oat varieties and breeding lines according to average fungal DNA levels in harvested grains (ln pg fungal DNA per  $\mu\text{g}$  plant DNA) estimated for: *F. avenaceum* (FA), *F. graminearum* + *F. culmorum* (FG+FC), *F. langsethiae* (FL), *F. poae* (FP), *M. majus* (MM) and *M. nivale* (MN). Fungal DNA content was analyzed in grains harvested from plants grown in naturally infested field trials in Norway, years 2013-2019. The estimated average mycotoxin or fungal DNA level for each variety included in this analysis is the output from Tukey pairwise comparisons after statistical analysis by mixed effects models in Minitab. The name of the different oat varieties and breeding lines are not indicated in the figure.
